# Supplementary material for: De novo identification of mammalian ciliary motility proteins using cryo-EM
Source: PubMed Central journal article supplement (PMC8595878; doi:10.1016/j.cell.2021.10.007), 2021-10-28
Supplement: NIHMS1749474-supplement-2.pdf [file NIHMS1749474-supplement-2.pdf]

SUPPLEMENTAL TABLES

**Table S2. Statistics for data collection, data processing, model refinement and validation, Related to Figure 1.**

|                                                     | <b>Composite map of 48-nm repeat<br/>(EMD-24664, PDB ID 7RRO)</b> | <b>ODA core<br/>(EMD-24663)</b> |
|-----------------------------------------------------|-------------------------------------------------------------------|---------------------------------|
| <b>Data collection</b>                              |                                                                   |                                 |
| Microscope                                          | Titan Krios                                                       | Titan Krios                     |
| Detector                                            | K3                                                                | K3                              |
| Voltage (keV)                                       | 300                                                               | 300                             |
| Nominal magnification                               | 81,000×                                                           | 81,000×                         |
| Electron exposure (e <sup>-</sup> /Å <sup>2</sup> ) | 60                                                                | 60                              |
| Defocus range set during data acquisition (μm)      | -1.0 to -2.5                                                      | -1.0 to -2.5                    |
| Pixel size (Å)                                      | 1.09                                                              | 1.09                            |
| <b>Data Processing</b>                              |                                                                   |                                 |
| Particles                                           | 80,503                                                            | 8,755                           |
| Map resolution (Å)                                  | 3.4                                                               | 8.0                             |
| <b>Model composition</b>                            |                                                                   |                                 |
| Chains                                              | 431                                                               |                                 |
| Atoms                                               | 1,276,295                                                         |                                 |
| Residues                                            | 161,535                                                           |                                 |
| Ligands                                             | 149 GTP / 153 GDP / 149 Mg                                        |                                 |
| <b>Refinement</b>                                   |                                                                   |                                 |
| Resolution limit set in refinement (Å)              | 3.6                                                               |                                 |
| Correlation coefficient (CCmask)                    | 0.71                                                              |                                 |
| C <sub>ref</sub> (masked) (Å)                       | 3.7                                                               |                                 |
| Root-mean-square deviation (bond lengths) (Å)       | 0.008                                                             |                                 |
| Root-mean-square deviation (bond angles) (Å)        | 1.196                                                             |                                 |
| <b>Validation</b>                                   |                                                                   |                                 |
| MolProbity Score                                    | 1.85                                                              |                                 |
| Clashscore                                          | 7.23                                                              |                                 |
| Rotamer outliers (%)                                | 0.24                                                              |                                 |
| Ramachandran (favored) (%)                          | 92.82                                                             |                                 |
| Ramachandran (outliers) (%)                         | 0.0                                                               |                                 |

**Table S3. Proteins associated with ciliopathies, Related to Figures 1, 6 and 7.**

| Axonemal protein               | Human disease association                                                                                                                                                                                   | Mouse knockout phenotype                                                                                                                                                                                                                  | Zebrafish phenotype                                                                                                                                                                                                                          |
|--------------------------------|-------------------------------------------------------------------------------------------------------------------------------------------------------------------------------------------------------------|-------------------------------------------------------------------------------------------------------------------------------------------------------------------------------------------------------------------------------------------|----------------------------------------------------------------------------------------------------------------------------------------------------------------------------------------------------------------------------------------------|
| <b>ODA-DC</b>                  |                                                                                                                                                                                                             |                                                                                                                                                                                                                                           |                                                                                                                                                                                                                                              |
| ARMC4 (ODAD2)                  | Laterality abnormalities, recurrent airway infections, bronchiectasis, neonatal respiratory distress, ODA loss, reduced ciliary beat (Hjeij et al., 2013; Onoufriadis et al., 2014).                        | Missense mutants (M993K) have laterality abnormalities, immotile tracheal cilia, decreased fluid flow by ependymal cilia, and ODA loss (Hjeij et al., 2013).                                                                              | <i>armc4</i> morphants have laterality abnormalities (Hjeij et al., 2013).                                                                                                                                                                   |
| Calaxin (EFCAB1, ODAD5)        |                                                                                                                                                                                                             | Laterality defects, abnormal sperm motility, decreased mucociliary flow rates (Sasaki et al., 2019).                                                                                                                                      | <i>calaxin</i> knockout mutants have laterality abnormalities (Sasaki et al., 2019).                                                                                                                                                         |
| CCDC114 (ODAD1)                | Laterality abnormalities, recurrent airway infections, neonatal respiratory distress, ODA loss, immotile cilia (Chen et al., 2020; Knowles et al., 2013; Onoufriadis et al., 2013; Wu and Singaraja, 2013). |                                                                                                                                                                                                                                           |                                                                                                                                                                                                                                              |
| CCDC151 (ODAD3)                | Laterality abnormalities, (Hjeij et al., 2014; Zhang et al., 2019).                                                                                                                                         | Perinatal lethality and congenital hydrocephalus, defective sperm motility (Chiani et al., 2019).<br><br><i>Ccdc151</i> <sup>Snbl</sup> mutants have laterality abnormalities, immotile tracheal cilia and ODA loss (Hjeij et al., 2014). | <i>ccdc151</i> morphants have laterality abnormalities, kidney cysts and immotile cilia (Jerber et al., 2014).                                                                                                                               |
| TTC25 (ODAD4)                  | Laterality abnormalities, recurrent airway infections, neonatal respiratory distress, ODA loss, immotile airway cilia (Wallmeier et al., 2016).                                                             | Laterality abnormalities (Wallmeier et al., 2016).                                                                                                                                                                                        | <i>ttc25</i> morphants have body curvature, hydrocephalus, and pronephric cyst formation (Xu et al., 2015).<br><br><i>Ttc25</i> <sup>ts272a</sup> mutants have body curvature and kidney cysts (Hjeij et al., 2014).                         |
| <b>Luminal proteins (MIPs)</b> |                                                                                                                                                                                                             |                                                                                                                                                                                                                                           |                                                                                                                                                                                                                                              |
| CFAP45                         | Laterality abnormalities and asthenospermia. Mild respiratory symptoms (Dougherty et al., 2020).                                                                                                            | Laterality abnormalities and asthenospermia (Dougherty et al., 2020).                                                                                                                                                                     |                                                                                                                                                                                                                                              |
| CFAP52 (WDR16)                 | Laterality abnormalities (Ta-Shma et al., 2015).                                                                                                                                                            |                                                                                                                                                                                                                                           | <i>cfap52</i> morphants have severe hydrocephalus (Hirschner et al., 2007).                                                                                                                                                                  |
| CFAP53 (MBD1, CCDC11)          | Laterality abnormalities (Narasimhan et al., 2015; Noël et al., 2016; Perles et al., 2012).                                                                                                                 | Laterality abnormalities, hydrocephalus, abnormal airway cilia, infertility, ODA loss in nodal cilia (Ide et al., 2020).                                                                                                                  | <i>cfap53</i> morphants have laterality abnormalities and body curvature (Narasimhan et al., 2015).<br><br><i>cfap53</i> mutants have disrupted laterality without additional morphological defects (Noël et al., 2016; Silva et al., 2016). |
| CFAP161 (C15orf26)             |                                                                                                                                                                                                             |                                                                                                                                                                                                                                           | <i>Cfap161</i> morphants have laterality defects, body curvature and ODA loss (Austin-Tse et al., 2013).                                                                                                                                     |
| CFAP276 (C1orf194)             | Associated with Charcot-Marie-Tooth disease (Sun et al., 2019).                                                                                                                                             | Motor and sensory defects (Huang et al., 2020).                                                                                                                                                                                           |                                                                                                                                                                                                                                              |
| EFHC1                          | Association with juvenile myoclonic epilepsy is debated (Gonsales et al., 2020).                                                                                                                            | Ventricle enlargement, reduced beat frequency of ependymal cilia, spontaneous myoclonus (Suzuki et al., 2009).                                                                                                                            |                                                                                                                                                                                                                                              |
| EFHC2                          |                                                                                                                                                                                                             |                                                                                                                                                                                                                                           | <i>efhc2</i> morphants have defects in pronephros development (Barrodia et al., 2018).                                                                                                                                                       |
| ENKUR                          |                                                                                                                                                                                                             | Subfertility and abnormal sperm motility (Jungnickel et al., 2018).                                                                                                                                                                       |                                                                                                                                                                                                                                              |
| FAM166B                        | Associated with Meckel-Gruber syndrome (Shamseldin et al., 2020).                                                                                                                                           |                                                                                                                                                                                                                                           |                                                                                                                                                                                                                                              |
| MNS1                           | Laterality abnormalities, infertility, oligoasthenoteratozoospermia, reduced ODA levels (Leslie et al., 2020; Li et al., 2020; Ta-Shma et al., 2018).                                                       | Laterality abnormalities, hydrocephalus, infertility, reduced ODA levels (Zhou et al., 2012).                                                                                                                                             |                                                                                                                                                                                                                                              |
| NME7                           | Laterality abnormalities (Reish et al., 2016).                                                                                                                                                              | Laterality abnormalities (Vogel et al., 2010).                                                                                                                                                                                            |                                                                                                                                                                                                                                              |

|                     |                                                                             |                                                                                                                                                                    |                                                                                                                                      |
|---------------------|-----------------------------------------------------------------------------|--------------------------------------------------------------------------------------------------------------------------------------------------------------------|--------------------------------------------------------------------------------------------------------------------------------------|
| PACRG               |                                                                             | Male sterility (Lorenzetti et al., 2004). Reduction in ependymal cilia beat frequency and cilia-mediated flow (Wilson et al., 2010).                               |                                                                                                                                      |
| Pierce1 (C9orf116)  |                                                                             | Laterality abnormalities, partial embryonic lethality associated with heterotaxia (Sung et al., 2016). Reduced airway and nodal cilia beat frequency (this study). | <i>Pierce1</i> and <i>C18h15orf65</i> double mutants have heart jogging defects, body curvature, and immotile KV cilia (this study). |
| Pierce 2 (C15orf65) |                                                                             | Reduced nodal cilia beat frequency (this study).                                                                                                                   | <i>Pierce1</i> and <i>Pierce2</i> double mutants have heart jogging defects, body curvature and immotile KV cilia (this study).      |
| Tektin 1            | Potentially associated with primary ciliary dyskinesia (Ryan et al., 2018). |                                                                                                                                                                    | <i>tekt1</i> morphants have mild body curvature, laterality defects, and cyst formation in the pronephros (Ryan et al., 2018).       |
| Tektin 2            |                                                                             | Male infertility, reduced sperm motility, reduced mucociliary flow (Tanaka et al., 2004).                                                                          |                                                                                                                                      |
| Tektin 3            |                                                                             | Reduced sperm motility, sperm flagella abnormalities (Roy et al., 2009).                                                                                           |                                                                                                                                      |
| Tektin 4            |                                                                             | Subfertility, sperm with reduced motility (Roy et al., 2007).                                                                                                      |                                                                                                                                      |

**Table S4. Oligonucleotides used in this paper, Related to STAR Methods.**

| Oligonucleotides                                        | Sequence (5' to 3')                                                                      | Source                                           | Identifier |
|---------------------------------------------------------|------------------------------------------------------------------------------------------|--------------------------------------------------|------------|
| Zebrafish pierce1 sgRNA forward primer:                 | GAAATTAATACGACTCACTATATGGTT<br>TGTTGTTCGGTACAGGTTTTAGAGCTA<br>GAAATA                     | Integrated<br>DNA<br>Technologies,<br>Inc. (IDT) | N/A        |
| Zebrafish pierce2 sgRNA forward primer:                 | GAAATTAATACGACTCACTATATCCA<br>GCGTCGCGGGTCGAGCGCCGGTTTTA<br>GAGCTAGAAAATA                | IDT                                              | N/A        |
| Zebrafish gRNA reverse:                                 | AAAAGCACCGACTCGGTGCCACTTTTT<br>CAAGTTGATAACGGACTAGCCTTATTT<br>TAACTTGCTATTTCTAGCTCTAAAAC | IDT                                              | N/A        |
| Zebrafish pierce1 genotyping forward primer:            | TACTCACAGGCATTTCTGTGAAC                                                                  | IDT                                              | N/A        |
| Zebrafish pierce1 genotyping reverse primer:            | TGAGTTTAAAATCAAAAACAAGCA                                                                 | IDT                                              | N/A        |
| Zebrafish pierce2 genotyping forward primer:            | ATGTGCAACTCTGCGCATC                                                                      | IDT                                              | N/A        |
| Zebrafish pierce2 genotyping reverse primer:            | TCTGTTTAAAGGACAGTGA                                                                      | IDT                                              | N/A        |
| Mouse Pierce1 gel-based genotyping (WT & Tm2b alleles): | ACAGGAGCTTGGCCTCTGTA                                                                     | Merck Life<br>Science                            | N/A        |
| Mouse Pierce1 gel-based genotyping (WT allele):         | AGAGCACTCTCTCCAGCAG                                                                      | Merck Life<br>Science                            | N/A        |
| Mouse Pierce1 gel-based genotyping (Tm2b allele):       | GAACTTCGGAATAGGAACTTCG                                                                   | Merck Life<br>Science                            | N/A        |
| Mouse Pierce1 Taqman genotyping (WT allele):            | GGCTGCTTTTGCCTTGAAAC                                                                     | LGC<br>Biosearch<br>Technologies                 | N/A        |
| Mouse Pierce1 Taqman genotyping (WT allele):            | CCAGCCATGCACGAAAAGTTC                                                                    | LGC<br>Biosearch<br>Technologies                 | N/A        |
| Mouse Pierce1 Taqman genotyping (Tm2b allele):          | CTCGCCACTTCAACATCAAC                                                                     | LGC<br>Biosearch<br>Technologies                 | N/A        |
| Mouse Pierce1 Taqman genotyping (Tm2b allele):          | TTATCAGCCGGAAAACCTACC                                                                    | LGC<br>Biosearch<br>Technologies                 | N/A        |
| Mouse Pierce2 gel-based genotyping (WT & DEL alleles):  | GATAAGAAAACCTCCTTGAC                                                                     | Merck Life<br>Science                            | N/A        |
| Mouse Pierce2 gel-based genotyping (WT & DEL alleles):  | TGTTTTGAGAATATGCATTG                                                                     | Merck Life<br>Science                            | N/A        |
| Mouse Pierce2 Taqman genotyping (WT allele):            | TTGGATCCAAGACATTGC                                                                       | LGC<br>Biosearch<br>Technologies                 | N/A        |
| Mouse Pierce2 Taqman genotyping (WT allele):            | TCTTGACATAATCATCTGGGCTTT                                                                 | LGC<br>Biosearch<br>Technologies                 | N/A        |
| Mouse Pierce1 RT-qPCR (WT allele):                      | CATGGCTACGGGACCAAGGA                                                                     | Merck Life<br>Science                            | N/A        |
| Mouse Pierce1 RT-qPCR (WT allele):                      | CCAAAAGCTGCGTGTGTCT                                                                      | Merck Life<br>Science                            | N/A        |
| Mouse Pierce1 RT-qPCR (Tm2b allele):                    | GAAAAACCTCAACAGTCCG                                                                      | Merck Life<br>Science                            | N/A        |
| Mouse Pierce1 RT-qPCR (Tm2b allele):                    | CGGGACCTGGGACCCGTAG                                                                      | Merck Life<br>Science                            | N/A        |
| Mouse Pierce2 RT-qPCR (WT & DEL alleles):               | CAGACTGCGACTTGATAAGAAA                                                                   | Merck Life<br>Science                            | N/A        |
| Mouse Pierce2 RT-qPCR (WT allele):                      | CTTTGACAGTGAGGTGGCT                                                                      | Merck Life<br>Science                            | N/A        |
| Mouse Pierce2 RT-qPCR (DEL allele):                     | CTTATACCCACAGAGCCG                                                                       | Merck Life<br>Science                            | N/A        |
| Mouse Pierce1 WISH probe plasmid generation:            | CTGTCAGCATCTTCTGTGTG                                                                     | Merck Life<br>Science                            | N/A        |
| Mouse Pierce1 WISH probe plasmid generation:            | GCACAGACTTGATCTGGGCTA                                                                    | Merck Life<br>Science                            | N/A        |

|                                              |                       |                    |     |
|----------------------------------------------|-----------------------|--------------------|-----|
| Mouse Pierce2 WISH probe plasmid generation: | ACTCCGATCGTCTTGCTGTT  | Merck Life Science | N/A |
| Pierce2 WISH probe plasmid generation:       | TCGATGGTCTGGTTCGGTC   | Merck Life Science | N/A |
| Mouse WISH plasmid sequencing (T7):          | TAATACGACTCACTATAGGG  | Merck Life Science | N/A |
| Mouse WISH plasmid sequencing (T3):          | ATTAACCCTCACTAAAG     | Merck Life Science | N/A |
| Mouse Gapdh RT-qPCR:                         | CGGCCGCATCTTCTTG TG   | Merck Life Science | N/A |
| Mouse Gapdh RT-qPCR:                         | CCGACCTTCACCATTTGTCTA | Merck Life Science | N/A |
