# Supplementary material for: De novo identification of mammalian ciliary motility proteins using cryo-EM
Source: PubMed Central journal article supplement (PMC8595878; doi:10.1016/j.cell.2021.10.007), 2021-10-28
Supplement: NIHMS1749474-supplement-3.pdf [file NIHMS1749474-supplement-3.pdf]

**Methods S1**  
**Cryo-EM data processing, Related to Figure 1.**

**Contents**

|                                                                      |      |
|----------------------------------------------------------------------|------|
| Processing scheme 1: 8 to 48 nm                                      | p.2  |
| Processing scheme 2: 48 to 96 nm                                     | p.3  |
| Processing scheme 3: Determining a map of the ODA                    | p.4  |
| Processing scheme 4: Lattice classification                          | p.5  |
| Processing scheme 5: Tektin classification                           | p.6  |
| Processing scheme 6: Focused protofilament refinement/classification | p.7  |
| Processing scheme 7: Determining a map of the ODA-DC                 | p.8  |
| Processing scheme 8: Determining maps of Pierce1 and Pierce2         | p.9  |
| Examples of map quality for all identified proteins                  | p.10 |
| Proteins of the bovine DMT identified using cryo-EM                  | p.11 |

**Key for all figures**

RX = re-box  
SC = shift center  
SS = signal subtraction  
RD = remove duplicate particles  
3C = 3D classification  
3R = 3D refinement  
MBR = multi-body refinement

## Processing scheme 1 : 8 to 48 nm

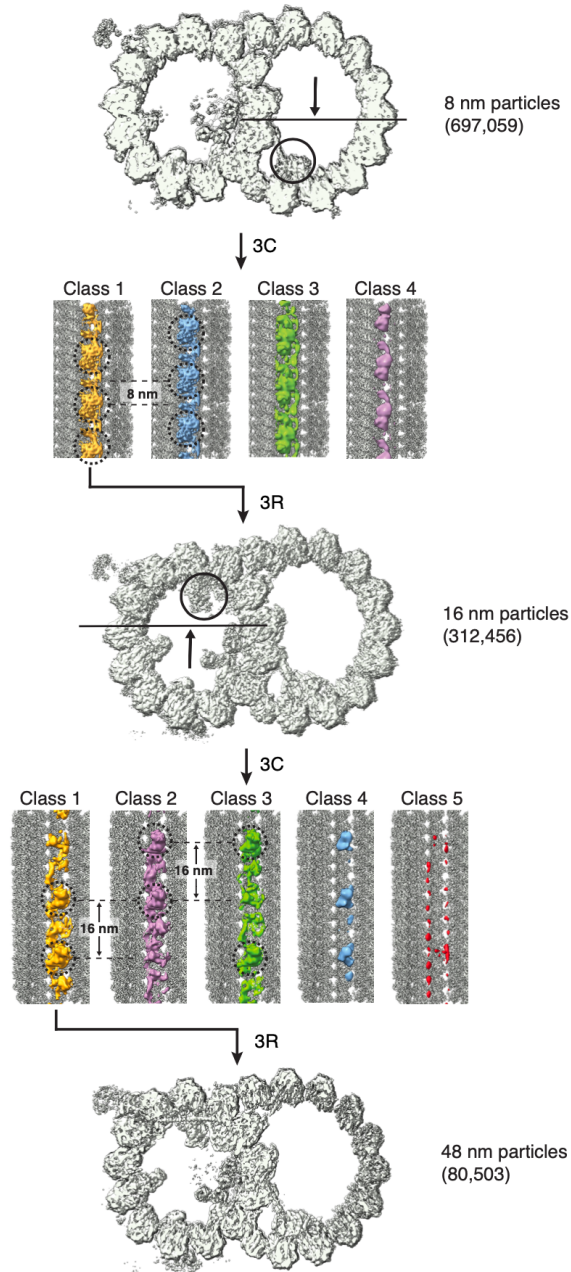

**Processing Scheme 1. 8 to 48 nm.** The 8-nm particles ( $n = 697,059$ ) were classified into four classes using a cylindrical mask (indicated by a circle) over the microtubule inner proteins at the inner junction. The most populous class, corresponding to the 16-nm repeat, was selected for further analysis. The 16-nm particles ( $n = 312,456$ ) were classified into five classes using a cylindrical mask (indicated by a circle) over the microtubule inner proteins at the seam of the A tubule. The most populous class, corresponding to the 48-nm repeat ( $n = 80,503$ ) was selected for further analysis. Tubulin density was subtracted before classification.

## Processing scheme 2 : 48 to 96 nm

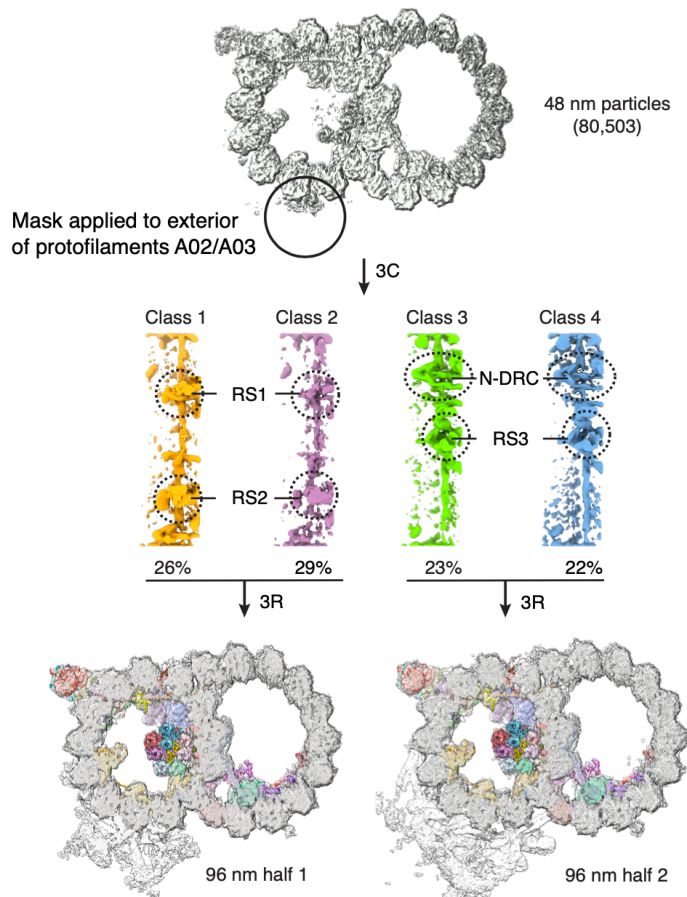

**Processing Scheme 1. 48 to 96 nm.** To determine maps corresponding to the two halves of the 96-nm repeat, the 48-nm particles ( $n = 80,503$ ) were classified into four classes using a cylindrical mask (indicated by a circle) over the external axonemal complexes bound to protofilaments A02 and A03. Classes were isolated corresponding to both halves of the 96-nm repeat; ones with radial spokes 1 and 2 (RS1 and RS2) and the others with RS3 and the nexin-dynein regulatory complex (N-DRC). Similar classes were combined and refined. Tubulin density was subtracted before classification.

### Processing scheme 3: Determining a map of the ODA

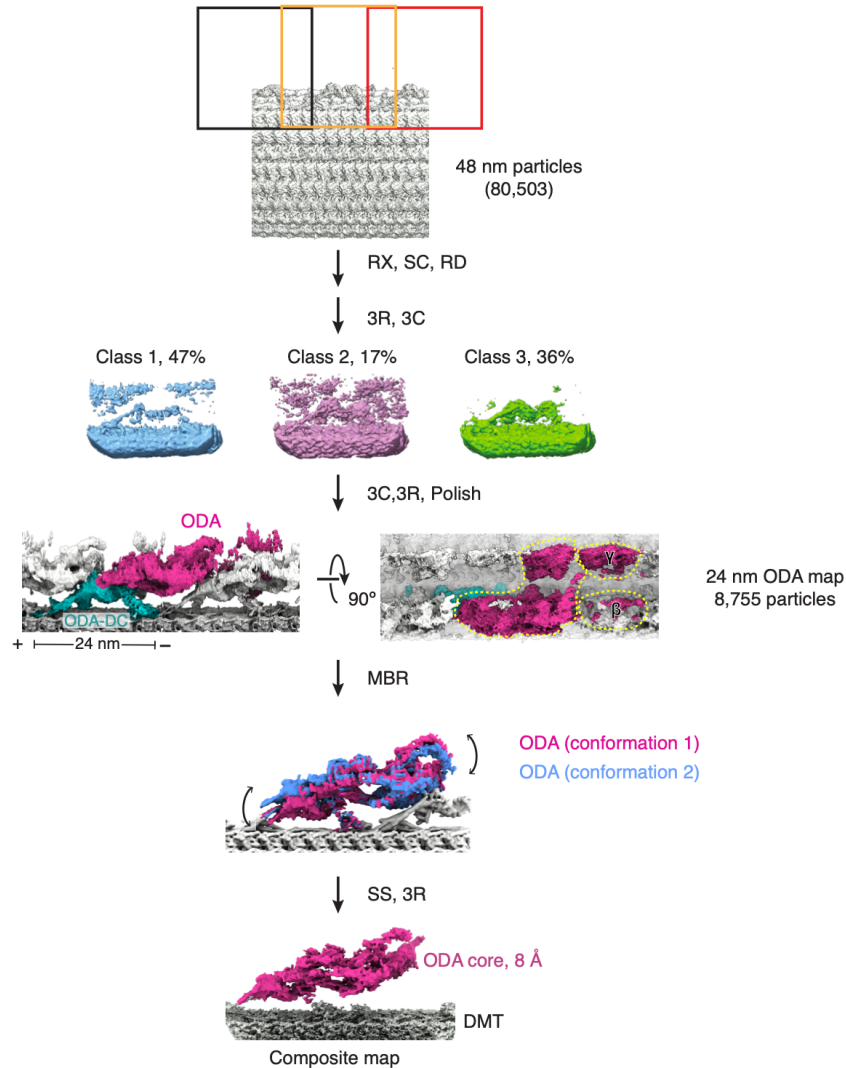

**Processing scheme 3. Determining a map of the ODA.** Processing scheme used to isolate ODA-bound particles. The 48-nm repeat map was divided into 3 subregions each focused on a full or partial copy of the ODA-DC. These regions were reboxed with a box size of 488 pixels and shifted to a common center. After excluding duplicates, the particles were aligned and reclassified to identify those with bound ODAs. The class with best density for the ODA was further classified, refined and polished. The motor domains of the  $\beta$  and  $\gamma$  subunits are poorly resolved compared to the ODA core due to flexibility and, for the  $\gamma$  subunit, averaging together paralogous heavy chains (DNAH11 and DNAH9) that localize to proximal to distal regions of the axoneme, respectively. Multi-body analysis of the remaining 8,755 particles revealed different conformations of the ODA relative to the doublet microtubule. The core of the ODA was refined, resulted in an 8-Å resolution reconstruction.

## Processing scheme 4 : Lattice classification

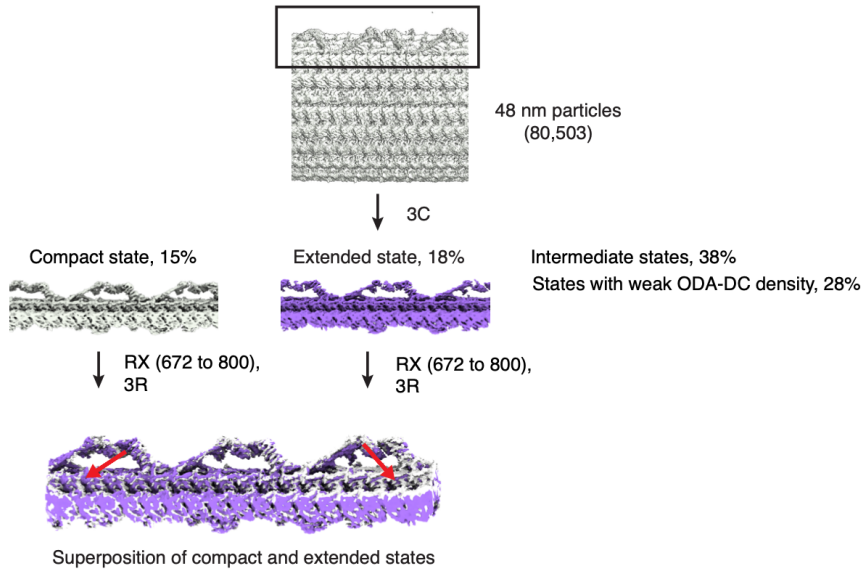

**Processing scheme 4. Lattice Classification.** Processing scheme used to isolate particles with different tubulin lattice dimensions. A cylindric mask was applied to classify protofilaments A07 and A08 into 8 classes. Particles with the shortest longitudinal spacing between tubulin heterodimers (the compact class) and the longest longitudinal spacing (the extended class) were re-extracted with a larger box size (800 pixels) and independently refined.

## Processing scheme 5 : Tektin classification

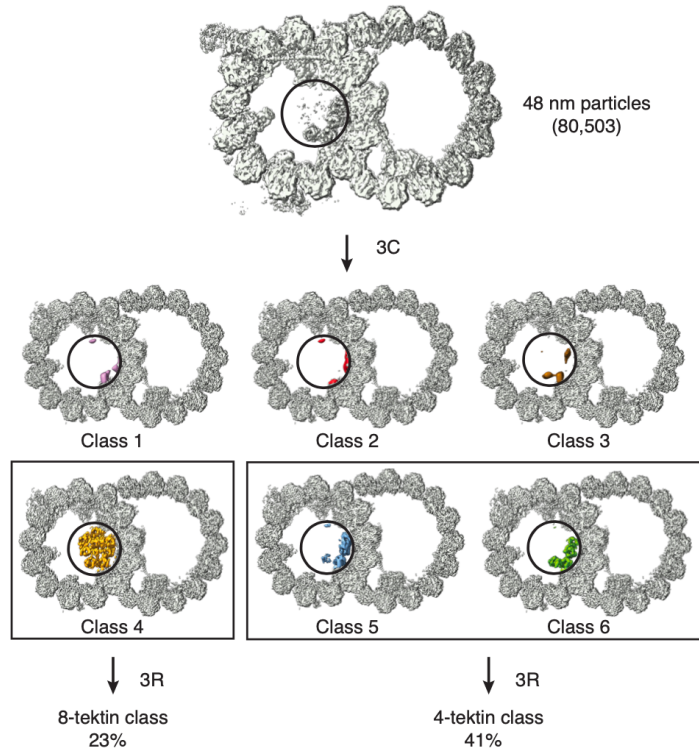

**Processing scheme 5. Tektin classification.** Density for the tektin bundle at the ribbon of the A tubule was less well-defined than other regions of the 48-nm map, indicating heterogeneity. We therefore performed focused classification using a cylindrical mask (indicated by a circle) over the bundle. Classes were isolated corresponding to no tektin, 4 tektin filaments, and 8 tektin filaments. Classes containing 4- or 8-tektin bundles were selected and independently refined.

## Processing scheme 6 : Focused protofilament refinement/classification

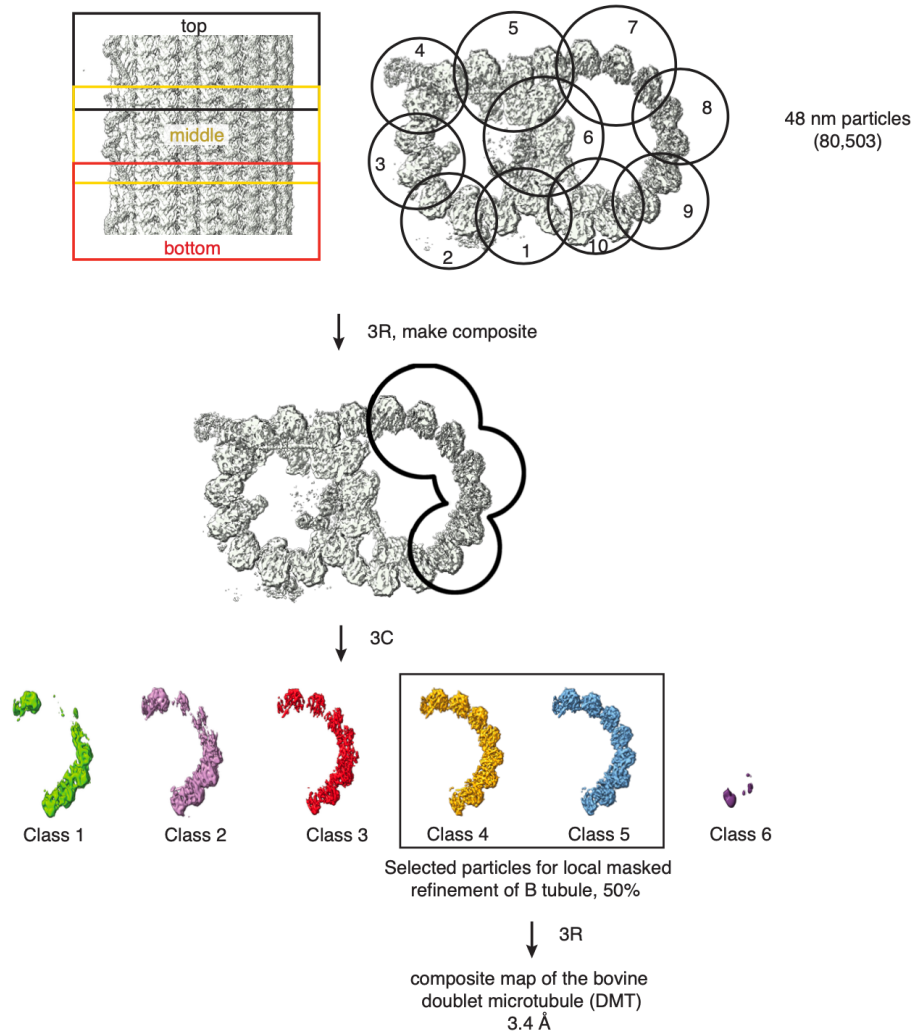

**Processing scheme 6. Focused protofilament refinement/classification.** To improve local map quality of the 48-nm repeat map, we performed a series of local refinements. Using a set of cylindrical masks, the doublet microtubule was split into 10 overlapping subregions each containing 2 or 3 protofilaments. Each subregion was subdivided into 3 longitudinal sections (top, middle, and bottom) and refined separately. Additionally, we noticed that the density for protofilaments B02-B05 was poorly resolved. To improve the density of the B tubule, cylindrical masks 7-9 were combined and used for focused three-dimensional classification. Classes displaying well-resolved density for protofilaments B02-B08 were merged and refined. This map is a constituent of the composite map of the bovine doublet microtubule.



## Processing scheme 7 : Determining a map of the ODA-DC

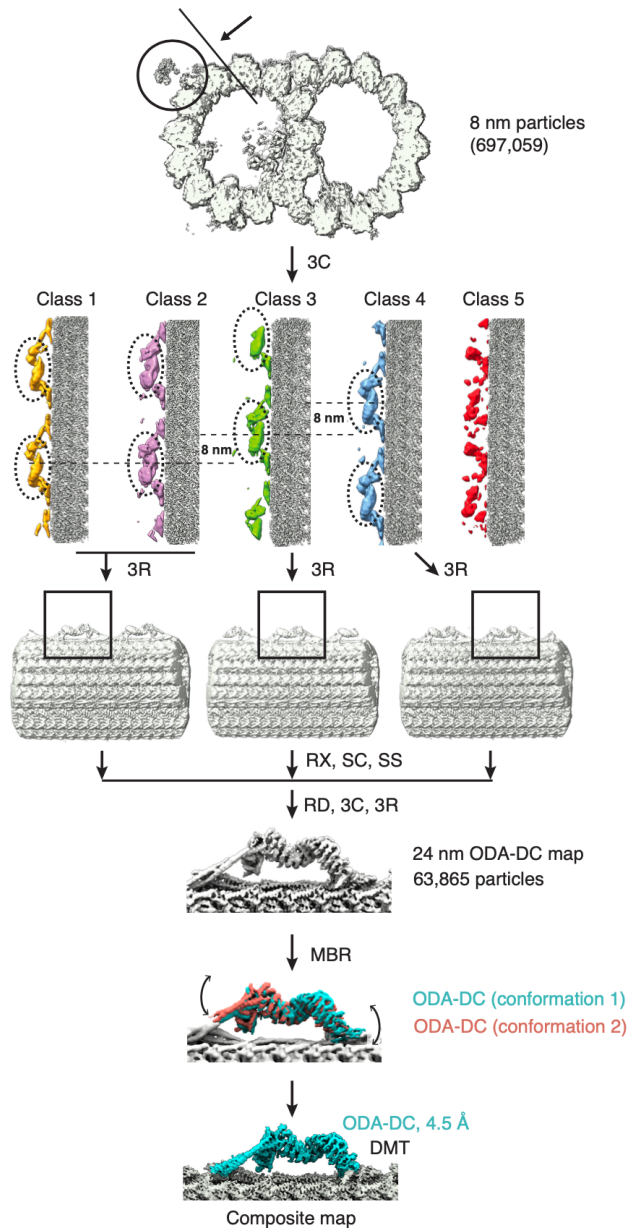

**Processing scheme 7. Determining a map of the ODA-DC.** Processing scheme used to generate a map of the ODA-DC. A cylindrical mask was used to classify density corresponding to the ODA-DC apparent on protofilaments A07-A08 of the 8-nm repeat map. Classes corresponding to all three different possible registers of the ODA-DC were independently refined and combined with a box size of 288 pixels. Duplicates were excluded and the particles reclassified and refined. The particles were then subjected to multi-body refinement leading to a 3.6 Å resolution map of the ODA-DC-bound microtubule and a 4.5 Å resolution map of the ODA-DC.



## Processing scheme 8 : Determining maps of Pierce1 and Pierce2

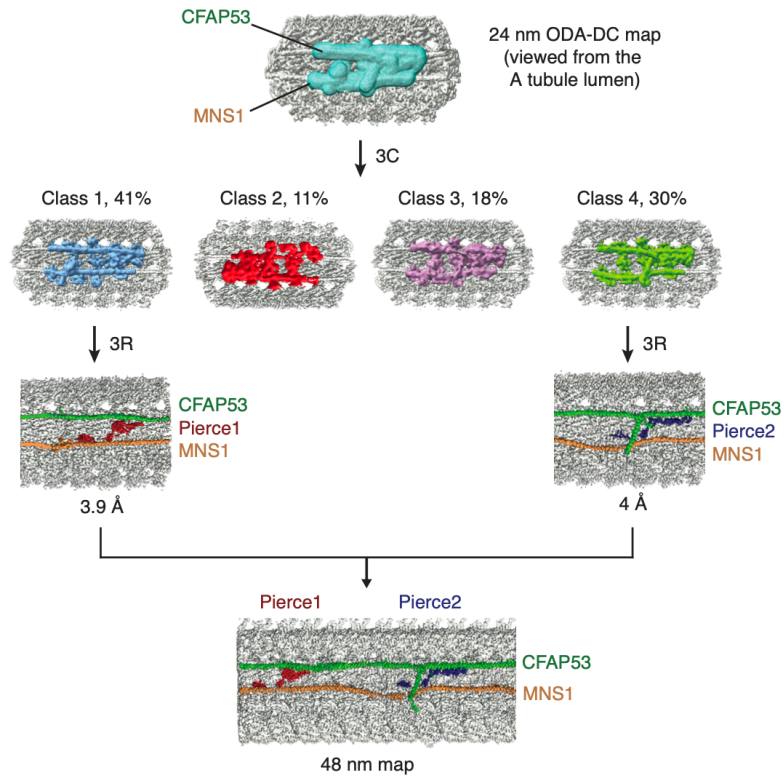

**Processing scheme 8. Determining maps of Pierce1 and Pierce2.** Processing scheme used to improve the map quality of Pierce1 and Pierce2. A shape mask was applied to MIP density on protofilaments A07-A09 of the 24-nm repeat map. Three-dimensional classification isolated two major classes: one centered on Pierce1 (left) and one centered on Pierce2 (right). These maps were independently refined and combined to generate the 48-nm repeat.

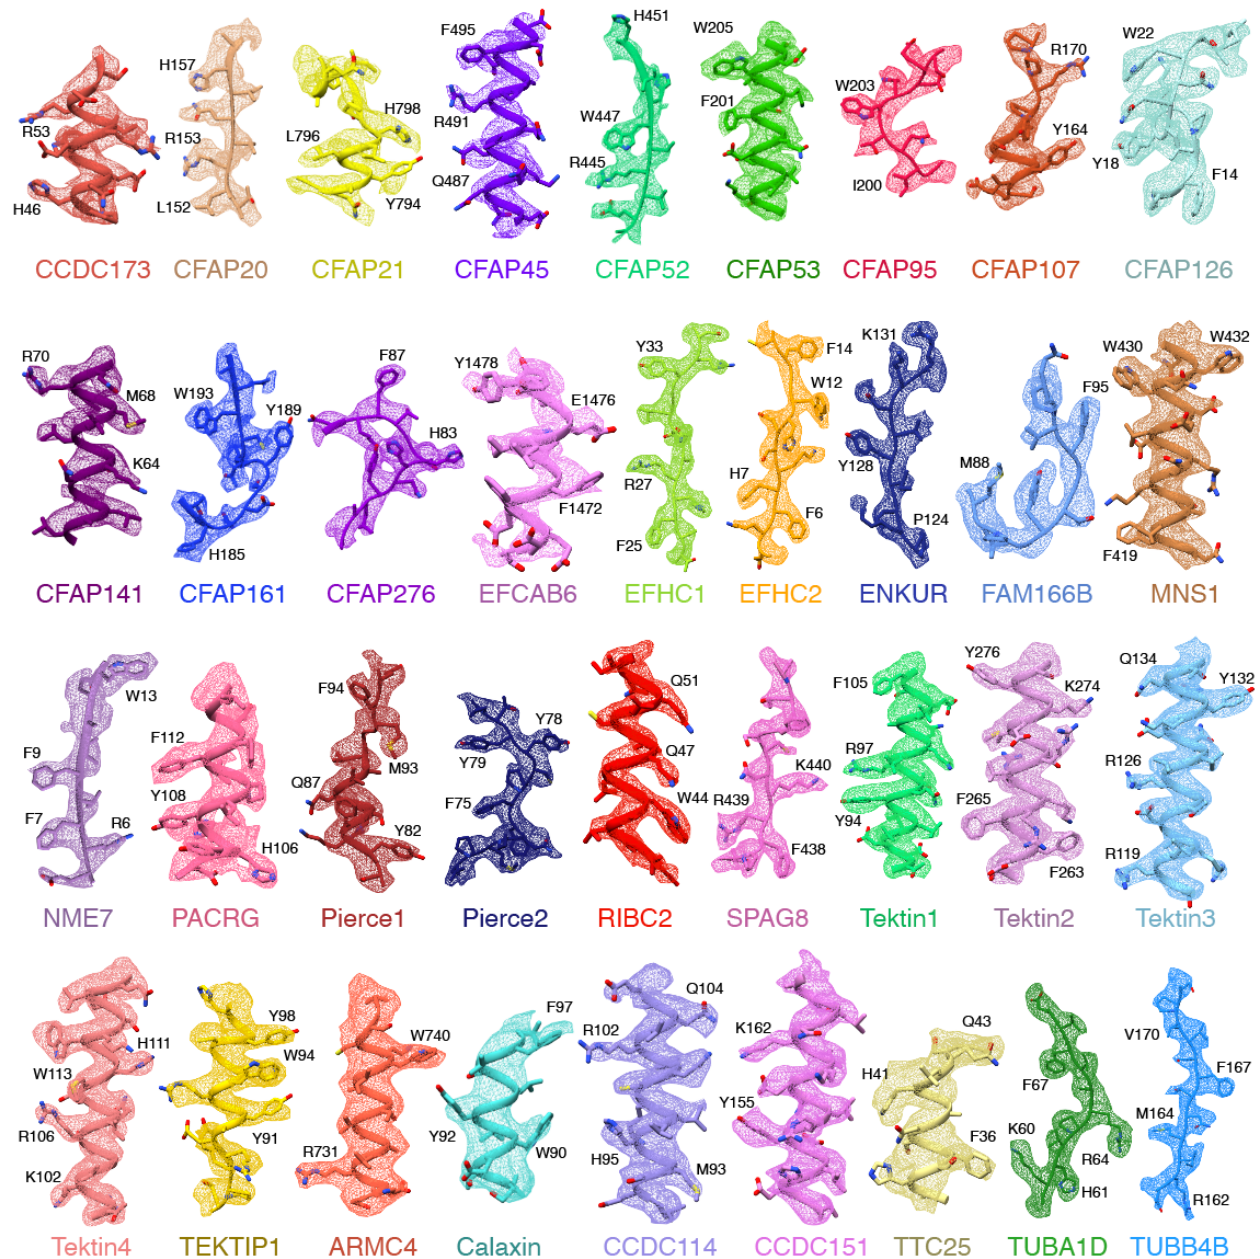

**Examples of map quality for all identified proteins.** Cryo-EM density for modeled regions of the doublet microtubule. Models are shown in stick representation within the density. Landmark residues are labeled. Densities are contoured at  $4.5 - 7\sigma$ .

**Proteins of the bovine DMT identified using cryo-EM.**

| Bovine axonemal protein        | UniProt ID | <i>Chlamydomonas</i> ortholog | Molecular mass in Da / (number of residues) | Periodicity          | Protofilament location | Built residues#                                             | Percentage of residues built (%) |
|--------------------------------|------------|-------------------------------|---------------------------------------------|----------------------|------------------------|-------------------------------------------------------------|----------------------------------|
| <b>ODA-DC</b>                  |            |                               |                                             |                      |                        |                                                             |                                  |
| ARMC4 (ODAD2)                  | E1B8W3     | -                             | 115,859 (1044)                              | 24 nm                | A07-A08                | <u>448-1043</u>                                             | 57                               |
| Calaxin (EFCAB1, ODAD5)        | Q32L26     | -                             | 24,635 (212)                                | 24 nm                | A07-A08                | <u>4-34, 49-203</u>                                         | 88                               |
| CCDC114 (ODAD1)                | F1N2N9     | DC2                           | 77,563 (687)                                | 24 nm                | A07-A08                | 28-277                                                      | 36                               |
| CCDC151 (ODAD3)                | A7MBH5     | DC1                           | 72,044 (621)                                | 24 nm                | A07-A08                | 68-316                                                      | 40                               |
| TTC25 (ODAD4)                  | A5PK42     | -                             | 78,368 (683)                                | 24 nm                | A07-A08                | 12-129, <u>185-258</u>                                      | 28                               |
| <b>Luminal proteins (MIPs)</b> |            |                               |                                             |                      |                        |                                                             |                                  |
| CFAP20                         | Q6B857     | FAP20                         | 22,748 (193)                                | 8 nm                 | Inner junction         | 1-184                                                       | 95                               |
| CFAP21 (EFHB)                  | F1MMV1     | FAP21                         | 97,819 (877)                                | 48 nm                | A08-A10                | <u>291-492, 585-607, 608-674, 710-755, 760-813, 814-865</u> | 51                               |
| CFAP45*                        | Q32LN4     | FAP45                         | 65,666 (549)                                | 48 nm                | B07-B10                | 75-92, 101-150, 159-543                                     | 83                               |
| CFAP52 (WDR16)                 | E1BKF9     | FAP52                         | 68,637 (623)                                | 16 nm                | B09-B10                | 13-622                                                      | 98                               |
| CFAP53 (MBD1, CCDC11)          | F1N7G5     | FAP53                         | 62,015 (514)                                | 48 nm                | A06-A11                | <u>35-122, 123-507</u>                                      | 92                               |
| CFAP95 (C9orf135)              | Q32L77     | FAP95                         | 26,623 (232)                                | 48 nm                | A09-A11                | <u>89-103, 112-153, 154-217</u>                             | 52                               |
| CFAP107 (C1orf158)             | Q2TA11     | FAP107                        | 23,234 (196)                                | 48 nm                | A09-A12                | 6-196                                                       | 97                               |
| CFAP126                        | Q3SZT6     | FAP126                        | 21,185 (196)                                | 16 nm                | A12-A13                | 2-119                                                       | 60                               |
| CFAP141 (C1orf189)             | Q32L75     | FAP141                        | 12,339 (101)                                | 48 nm                | A09-A11                | 11-101                                                      | 90                               |
| CFAP161 (C15orf26)             | F6RJC2     | FAP161                        | 36,470 (321)                                | 2 copies every 48 nm | A09-A11                | 4-97, 111-271                                               | 79                               |
| CFAP210 (CCDC173)              | E1BJL9     | FAP210                        | 65,300 (547)                                | 48 nm                | B06-B10                | <u>38-90, 91-170, 177-300, 307-328, 336-493</u>             | 80                               |
| CFAP276 (C1orf194)             | E1B9I5     | FAP276                        | 19,358 (170)                                | 16 nm                | B09-10, A13-A01        | 66-101, 128-170                                             | 46                               |
| EFCAB6†                        | A0A4W2DZI5 | -                             | 172,742 (1,497)                             | 48 nm                | A13-B10                | <u>1319-1496</u>                                            | 12                               |
| EFHC1                          | E1BKH1     | RIB72                         | 74,032 (640)                                | 16 nm                | A12-A05                | 7-54, 84-369, 414-531                                       | 71                               |

|                       |            |        |                 |                            |                            |                                                              |           |
|-----------------------|------------|--------|-----------------|----------------------------|----------------------------|--------------------------------------------------------------|-----------|
| EFHC2                 | A0A3Q1N1R0 | RIB72  | 85,454<br>(733) | 16 nm                      | A12-A05                    | 2-188, 200-293,<br>302-365, 374-<br>402, 418-596,<br>602-684 | 87        |
| ENKUR<br>(CFAP106)    | E1B836     | FAP106 | 30,157<br>(259) | 16 nm                      | A12-13, B09-<br>B10        | 9-95, 106-253                                                | 91        |
| FAM166B               | Q2TBR5     | -      | 30,514<br>(274) | 8 nm                       | A01-A05                    | 14-64, 84-116,<br>172-208, 234-<br>264                       | 55        |
| MNS1                  | F1MH18     | FAP127 | 60,456<br>(494) | 48 nm                      | A07-A11                    | 130-483                                                      | 72        |
| NME7                  | Q5E9Y9     | FAP67  | 42,599<br>(377) | 2 copies<br>every 48<br>nm | A09                        | 4-375                                                        | 99        |
| PACRG                 | A5PK71     | PACRG  | 29,284<br>(257) | 8 nm                       | Inner junction             | 38-256                                                       | 85        |
| Pierce1<br>(C9orf116) | Q32P67     | FAP182 | 15,654<br>(136) | 48 nm                      | A07-A08                    | 22-136                                                       | 85        |
| Pierce2<br>(C15orf65) | A0A3Q1LFK7 | FAP182 | 13,771<br>(120) | 48 nm                      | A07-A08                    | 25-120                                                       | 80        |
| RIBC2                 | Q32LJ7     | RIB43a | 44,695<br>(377) | 48 nm                      | A11-A13                    | 5-377                                                        | 99        |
| SPAG8                 | E1BNS6     | FAP143 | 51,542<br>(484) | 48 nm                      | A09-A13                    | <u>286-300, 309-<br/>370, 383-452</u>                        | <u>30</u> |
| Tektin 1              | Q32KZ9     | -      | 48,719<br>(418) | 16 nm                      | A tubule<br>lumen          | 6-403                                                        | 95        |
| Tektin 2              | Q2T9Q6     | -      | 49,886<br>(430) | 16 nm                      | A tubule<br>lumen          | 2-428                                                        | 99        |
| Tektin 3†             | A6H782     | -      | 56,681<br>(490) | 16 nm                      | A tubule<br>lumen          | 43-486                                                       | 91        |
| Tektin 4              | Q2TA38     | -      | 51,945<br>(447) | 16 nm                      | A tubule<br>lumen          | 22-447                                                       | 95        |
| TEKTIP1<br>(C19orf71) | Q2M2T2     | -      | 24,500<br>(208) | 16 nm                      | Associated<br>with tektins | 15-158                                                       | 69        |

# Underscored residues have sidechains truncated due to the map quality.

\* Unable to differentiate three CFAP45 isoforms (UniProt entries Q32LN4, F6PXG2, and A0A3Q1MJ67) by density or mass spectrometry.

† Unable to differentiate between UniProt entry A0A4W2DZI5 from *Bos indicus* x *Bos taurus* (Hybrid cattle) and NCBI entry XP\_003586209.2, which has three amino acids different from A0A4W2DZI5. An alternative EF-hand-containing protein cannot be discounted at this position.

‡ Unable to differentiate two Tektin 3 isoforms (UniProt entries A6H782 and F1MX07) by density or mass spectrometry.

In all cases of ambiguity, the UniProt entry listed in the table above was used for modeling.
